# Supplementary material
Source: PubMed Central journal article supplement (PMC5592134)
Supplement: NIHMS873486-supplement-supplement_1.pdf [file NIHMS873486-supplement-supplement_1.pdf]

1 **Table e1.** Characteristics of children admitted to the hospital with food-induced anaphylaxis.

|                                                                   | n=100            |
|-------------------------------------------------------------------|------------------|
| <i>Demographic characteristics</i>                                |                  |
| Age, median (IQR)                                                 | 3.8 (1.4 – 10.2) |
| Male (%)                                                          | 67 (67%)         |
| White race/ethnicity (%)                                          | 74 (74%)         |
| <i>Medical history</i>                                            |                  |
| Known allergy to offending allergen (%)                           | 44 (44%)         |
| Known allergic problems (%)                                       | 77 (77%)         |
| Prior allergic reaction to other sources (%)                      | 33 (33%)         |
| Asthma (%)                                                        | 39 (39%)         |
| Hayfever (%)                                                      | 21 (21%)         |
| Atopic dermatitis (%)                                             | 30 (30%)         |
| Hives (%)                                                         | 1 (1%)           |
| Angioedema (%)                                                    | 0 (0%)           |
| Other (%)                                                         | 3 (3%)           |
| Patient owns epinephrine auto-injector (%) ( <i>n=7 missing</i> ) | 39 (42%)         |
| Other chronic medical problems (%)                                | 24 (24%)         |
| Cardiac disorder (%)                                              | 0 (0%)           |
| Respiratory disorder other than asthma (%)                        | 1 (1%)           |
| Other major illness (%)                                           | 24 (24%)         |
| Chronic medications (%)                                           | 51 (51%)         |
| Inhaled beta-agonists (%)                                         | 33 (33%)         |
| H-1 blockers (%)                                                  | 13 (13%)         |
| H-2 blockers (%)                                                  | 2 (2%)           |
| Inhaled steroids (%)                                              | 19 (19%)         |
| Oral steroids (%)                                                 | 0 (0%)           |
| Beta-blockers (%)                                                 | 0 (0%)           |
| ACE inhibitors (%)                                                | 0 (0%)           |
| Leukotriene modifiers (%)                                         | 12 (12%)         |
| Other (%)                                                         | 16 (16%)         |
| <i>Current reaction</i>                                           |                  |
| Specific food trigger causing current reaction                    |                  |
| Peanuts (%)                                                       | 31 (31%)         |
| Tree nuts (%)                                                     | 28 (28%)         |
| Seeds (%)                                                         | 0 (0%)           |
| Fruits and vegetables (%)                                         | 2 (2%)           |
| Crustaceans (%)                                                   | 6 (6%)           |
| Fish (%)                                                          | 1 (1%)           |
| Milk products (%)                                                 | 20 (20%)         |

2

3

4 **Table e1.** (continued)

|                                                                    |          |
|--------------------------------------------------------------------|----------|
| Eggs (%)                                                           | 6 (6%)   |
| Wheat (%)                                                          | 0 (0%)   |
| Other food (%)                                                     | 12 (12%) |
| Location of exposure (%) ( <i>n=7 missing</i> )                    |          |
| Home                                                               | 61 (66%) |
| School/daycare                                                     | 7 (8%)   |
| Work                                                               | 0 (0%)   |
| Restaurant                                                         | 3 (3%)   |
| Other                                                              | 22 (24%) |
| Symptom onset (time before ED arrival) (%) ( <i>n=20 missing</i> ) |          |
| <1 hr                                                              | 35 (44%) |
| 1-3 hrs                                                            | 35 (44%) |
| 4-6 hrs                                                            | 5 (6%)   |
| 7-12 hrs                                                           | 0 (0%)   |
| >12 hrs                                                            | 5 (6%)   |
| Route of exposure                                                  |          |
| Oral (%)                                                           | 99 (99%) |
| Skin contact (%)                                                   | 1 (1%)   |
| Inhalation (%)                                                     | 1 (1%)   |
| Other (%)                                                          | 0 (0%)   |
| Pre-ED/ED signs and symptoms                                       |          |
| Skin rash (%)                                                      | 88 (88%) |
| Itching (%)                                                        | 45 (45%) |
| Swelling (%)                                                       | 76 (76%) |
| Trouble Swallowing (%)                                             | 36 (36%) |
| Shortness of Breath (%)                                            | 69 (69%) |
| Wheezing (%)                                                       | 55 (55%) |
| Hoarse voice (%)                                                   | 14 (14%) |
| Stridor (%)                                                        | 14 (14%) |
| Nausea/Vomiting (%)                                                | 43 (43%) |
| Abdominal pain (%)                                                 | 10 (10%) |
| Diarrhea (%)                                                       | 2 (2%)   |
| Abdominal tenderness (%)                                           | 0 (0%)   |
| Dizziness/fainting (%)                                             | 5 (5%)   |
| Altered Mental Status (%)                                          | 6 (6%)   |
| Other (%)                                                          | 18 (18%) |
| Organ systems involved in allergic reaction                        |          |
| Respiratory (%)                                                    | 83 (83%) |
| Cutaneous (%)                                                      | 97 (97%) |
| Gastrointestinal (%)                                               | 70 (70%) |
| Cardiovascular (%)                                                 | 10 (10%) |
| Other (%)                                                          | 18 (18%) |

5

6 **Table e1.** (continued)

*Treatments before hospitalization*

|                           |          |
|---------------------------|----------|
| Pre-ED treatments (%)     | 77 (77%) |
| Epinephrine (%)           | 44 (44%) |
| Diphenhydramine (%)       | 59 (59%) |
| Other antihistamines (%)  | 3 (3%)   |
| Steroids (%)              | 17 (17%) |
| Intravenous fluids (%)    | 3 (3%)   |
| Inhaled Beta-agonists (%) | 15 (15%) |
| Oxygen (%)                | 10 (10%) |
| Other (%)                 | 1 (1%)   |

Number pre-ED epinephrine doses (%)

|    |          |
|----|----------|
| 0  | 56 (56%) |
| 1  | 41 (41%) |
| 2+ | 3 (3%)   |

Administration of pre-ED epinephrine (n=44) (%)

|                            |          |
|----------------------------|----------|
| Patient's own device       | 22 (50%) |
| Emergency medical services | 17 (39%) |
| Outside hospital           | 5 (11%)  |
| School Nurse               | 1 (2%)   |
| Other                      | 1 (2%)   |

*Emergency Department treatments*

|                                 |          |
|---------------------------------|----------|
| ED treatments (%)               | 94 (94%) |
| Epinephrine (%)                 | 62 (62%) |
| Diphenhydramine (%)             | 59 (59%) |
| Other antihistamines (%)        | 48 (48%) |
| Steroids (%)                    | 84 (84%) |
| Intravenous fluids (%)          | 44 (44%) |
| Inhaled Beta-agonists (%)       | 49 (49%) |
| Inhaled ipratropium (%)         | 19 (19%) |
| Inhaled racemic epinephrine (%) | 10 (10%) |
| Oxygen (%)                      | 8 (8%)   |
| Anti-pyretics (%)               | 6 (6%)   |
| Anti-emetics (%)                | 6 (6%)   |

Number ED epinephrine doses (%)

|    |          |
|----|----------|
| 0  | 38 (38%) |
| 1  | 49 (49%) |
| 2+ | 13 (13%) |

Total epinephrine doses prior to hospitalization (Pre-ED &ED) (%)

|    |          |
|----|----------|
| 0  | 11 (11%) |
| 1  | 59 (59%) |
| 2  | 26 (26%) |
| 3+ | 4 (4%)   |

---

IQR denotes interquartile range; ED, emergency department
